# Supplementary material
Source: publisher figshare collection journal article supplement (https://sage.figshare.com/ndownloader/files/14182709)
Supplement: Supplementary file 1 [file 14182709]

## 1 **Supplemental Appendix 1: Radiomics System of CAD Scheme**

2 A total of 409 quantitative features were designed and extracted for each MDCT  
3 image to quantify and assess tumor characteristics. We classified guideline-based features  
4 and radiomics high-throughput features into six specific subcategories: (1) the  
5 demographic information, (2) the tumor location, (3) morphology features, (4) intensity  
6 features, (5) texture features, and (6) wavelet features. We show the detailed feature list  
7 in **Supplemental Table 1**.

- 8 1. The demographic information about the age and sex are obtained from the PACS.
- 9 2. The feature of the tumor location is recorded by radiologists, which reflects the  
10 location information of tumors in the pancreas (head, neck, body, or tail).
- 11 3. Morphological features are used to describe the geometric and radiology  
12 characteristics of a tumor, including the size, shape, margin, cyst number, cyst  
13 size and calcification.
- 14 4. Intensity features reflect the gray-level and histogram distributions of the images.  
15 T or H representing this feature is calculated on gray levels or histograms. For  
16 example, T-kurtosis is the kurtosis of gray levels while H-kurtosis is the kurtosis  
17 of histograms.
- 18 5. Five types of texture features are used to reflect detailed and invisible gray-level

- 1 variations and relationships in an image.
- 2 a. Region of interest-based features depict the distribution of gray levels in the  
3 entire region of interest.
- 4 b. Gray-level co-occurrence matrix (GLCM) features show the spatial linear  
5 relationship between the frequencies of two gray-level intensities in a certain  
6 range.
- 7 c. Gray-level run-length matrix (GLRLM) features are based on the gray-level  
8 run lengths. The length of the run is the number of pixels in the run, reflecting the  
9 size of the texture elements.
- 10 d. Gray-level size zone matrix (GLSZM) features are based on the co-occurrences  
11 of the intensity of each flat zone. They provide a statistical representation by  
12 estimating a bivariate conditional probability density function of the image  
13 distribution values.
- 14 e. Neighborhood gray-tone difference matrix (NGTDM) features reflect the  
15 differences between the pixel and its surrounding neighbors.
- 16 6. Wavelet decomposition features are applied to find more detailed intensity and  
17 texture information. The discrete wavelet transform iteratively decomposes a  
18 two-dimensional image into four components and all intensity and texture

1 features are calculated in each component.

2

3 **Supplemental Table 1: List of 409 Quantitative Features in the Radiomics System**

|                                    |                        |                                        |
|------------------------------------|------------------------|----------------------------------------|
| Guideline-based features           | Demography information | Age                                    |
|                                    |                        | Sex                                    |
|                                    | Tumor location         | Tumor location                         |
|                                    | Morphologic features   | Compactness                            |
|                                    |                        | Spiculation                            |
|                                    |                        | Extreme point number                   |
|                                    |                        | Rectangle-fitting factor               |
|                                    |                        | Roundness                              |
|                                    |                        | Convexity                              |
|                                    |                        | Solidity                               |
|                                    |                        | Moment difference                      |
|                                    |                        | Diameter of equivalent circle          |
|                                    |                        | SD of normalized radius                |
|                                    |                        | Entropy of normalized radius histogram |
|                                    |                        | Edge roughness                         |
|                                    |                        | Area-circumference ratio               |
|                                    |                        | Number of calcification                |
|                                    |                        | SD of calcification area               |
|                                    |                        | Calcification location                 |
|                                    |                        | Central scar density                   |
| Boundary area density              |                        |                                        |
| Number of cyst                     |                        |                                        |
| Cyst size                          |                        |                                        |
| SD of cyst area                    |                        |                                        |
| Radiomics high-throughput features | Intensity features     | T-energy                               |
|                                    |                        | T-entropy                              |
|                                    |                        | T-kurtosis                             |
|                                    |                        | T-mean                                 |
|                                    |                        | T-mean absolute deviation              |
|                                    |                        | T-median                               |
|                                    |                        | T-range                                |
|                                    |                        | T-uniformity                           |
|                                    |                        | T-variance                             |
|                                    |                        | T-root mean square                     |

|                                      |                            |                          |
|--------------------------------------|----------------------------|--------------------------|
|                                      |                            | T-skewness               |
|                                      |                            | T-SD                     |
|                                      |                            | H-kurtosis               |
|                                      |                            | H-mean                   |
|                                      |                            | H-variance               |
|                                      |                            | H-skewness               |
|                                      | ROI-based texture features | Mean of contrast         |
|                                      |                            | SD of contrast           |
|                                      |                            | Mean of covariance       |
|                                      |                            | SD of covariance         |
|                                      |                            | Mean of non-similarity   |
|                                      |                            | SD of non-similarity     |
|                                      |                            | SD of tumor area         |
|                                      | GLCM texture features      | Autocorrelation          |
|                                      |                            | Contrast                 |
|                                      |                            | Correlation 1            |
|                                      |                            | Correlation 2            |
|                                      |                            | Cluster prominence       |
|                                      |                            | Cluster shade            |
|                                      |                            | Dissimilarity            |
|                                      |                            | Energy                   |
|                                      |                            | Entropy                  |
|                                      |                            | Homogeneity 1            |
|                                      |                            | Homogeneity 2            |
|                                      |                            | Maximum probability      |
|                                      |                            | Sum of squares: variance |
|                                      |                            | Sum average              |
|                                      |                            | Sum variance             |
|                                      |                            | Sum entropy              |
|                                      |                            | Difference variance      |
|                                      |                            | Difference entropy       |
|                                      |                            | IMC1                     |
| IMC2                                 |                            |                          |
| Inverse difference                   |                            |                          |
| Inverse difference normalized        |                            |                          |
| Inverse difference moment normalized |                            |                          |
| GLRLM texture features               | Short-run emphasis         |                          |
|                                      | Long-run emphasis          |                          |

|  |                                |                                                                       |
|--|--------------------------------|-----------------------------------------------------------------------|
|  |                                | Gray-level nonuniformity                                              |
|  |                                | Run-length nonuniformity                                              |
|  |                                | Run percentage                                                        |
|  |                                | Low gray-level run emphasis                                           |
|  |                                | High gray-level run emphasis                                          |
|  |                                | Gray-level variance                                                   |
|  |                                | Short-run high gray-level emphasis                                    |
|  |                                | Long-run low gray-level emphasis                                      |
|  |                                | Long-run high gray-level emphasis                                     |
|  |                                | Short-run low gray-level emphasis                                     |
|  |                                | Run-length variance                                                   |
|  | GLSZM texture features         | Small zone emphasis                                                   |
|  |                                | Large zone emphasis                                                   |
|  |                                | Gray-level nonuniformity                                              |
|  |                                | Zone-size nonuniformity                                               |
|  |                                | Zone percentage                                                       |
|  |                                | Low gray-level zone emphasis                                          |
|  |                                | High gray-level zone emphasis                                         |
|  |                                | Gray-level variance                                                   |
|  |                                | Small-zone high gray-level emphasis                                   |
|  |                                | Large-zone low gray-level emphasis                                    |
|  |                                | Large-zone high gray-level emphasis                                   |
|  |                                | Small-zone low gray-level emphasis                                    |
|  |                                | Zone-size variance                                                    |
|  | NGTDM texture features         | Coarseness                                                            |
|  |                                | Contrast                                                              |
|  |                                | Busyness                                                              |
|  |                                | Complexity                                                            |
|  |                                | Strength                                                              |
|  | Wavelet decomposition features | All intensity and texture features are calculated for each component. |

1 Abbreviations: GLCM = gray-level co-occurrence matrix; GLRLM = gray-level run-  
2 length matrix; GLSZM = gray-level size zone matrix; IMC = informational measure of  
3 correlation; NGTDM = neighborhood gray-tone difference matrix; ROI = region of  
4 interest; SD = standard deviation.

5

6 **Supplemental Appendix 2: Optimal Radiomics Features**

1 The 22 most frequently selected features in all bootstrapping repetitions were used to  
 2 construct the final optimal feature subsets (**Supplemental Table 2**).

3  
 4 **Supplemental Table 2: Summary of Optimal Feature Subsets**

| Category                           | Feature Name                     |
|------------------------------------|----------------------------------|
| Guideline-based features           | Sex                              |
|                                    | Tumor location                   |
|                                    | Rectangle-fitting factor         |
|                                    | Moment difference                |
|                                    | Cyst size                        |
| Radiomics high-throughput features | Intensity T-range                |
|                                    | Intensity H-kurtosis             |
|                                    | Wavelet intensity H-skewness     |
|                                    | Wavelet mean of ROI contrast     |
|                                    | Wavelet mean of ROI covariance   |
|                                    | Wavelet GLCM sum variance        |
|                                    | NGTDM contrast                   |
|                                    | NGTDM busyness                   |
|                                    | Wavelet intensity T-median       |
|                                    | Wavelet intensity T-mean         |
|                                    | Wavelet intensity H-mean         |
|                                    | Wavelet GLCM contrast            |
|                                    | Wavelet GLCM sum average         |
|                                    | Wavelet GLCM difference variance |
|                                    | Wavelet GLCM cluster shade       |
|                                    | Wavelet NGTDM complexity         |
|                                    | Wavelet NGTDM busyness           |

5 Abbreviations: GLCM = gray-level co-occurrence matrix; NGTDM = neighborhood  
 6 gray-tone difference matrix; ROI = region of interest.

7
